# Supplementary material for: Single-RNA-level analysis of full-length HIV-1 RNAs reveals functional redundancy of m6As
Source: Research Square preprint supplement (doi:10.21203/rs.3.rs-2679540/v1), 2023-06-16
Supplement: Supplementary file 1 [file 01b7249232181635c51d587e.xlsx]

## Sheet: 186_exon_comb
		WT1	WT2	WT3	WT4	Triple1	Triple2	Triple3	A8079G	A8975C	A8989T	A8110G	SUM
		315	1421	1845	861	2096	3347	1929	2408	765	1844	2604
D1A1bD2A2D3A5	Env/vpu	0	0	0	0	1	0	0	0	0	0	0	1
D1A1D2A2D3A4a	Env/vpu	0	0	1	1	1	2	0	0	1	1	1	8
D1A1D2A4b	Env/vpu	0	1	3	0	0	3	4	0	1	2	2	16
D1A1D2A5a	Env/vpu	0	0	1	0	0	2	1	1	0	0	0	5
D1A4c	Env/vpu	0	0	2	2	0	1	0	3	0	2	0	10
D1cA1bD2A5	Env/vpu	0	1	2	0	0	1	2	3	0	0	0	9
D1cA1D2A5	Env/vpu	0	2	1	1	1	3	1	1	0	0	0	10
D1cA2D3A5	Env/vpu	0	1	1	0	0	0	1	0	0	0	1	4
D1A2D3A4a	Env/vpu	0	0	2	2	3	3	2	2	1	1	0	16
D1A2D3A5a	Env/vpu	1	0	0	1	1	0	0	2	0	0	2	7
D1cA1D2A5a	Env/vpu	0	0	0	0	0	0	0	1	0	0	0	1
D1cA1bD2A2D3A5	Env/vpu	0	0	0	0	0	1	0	2	1	0	0	4
D1cA1D2A2D3A4b	Env/vpu	0	0	0	0	0	0	0	1	0	0	0	1
D1cA1D2A2D3A5	Env/vpu	0	0	0	1	0	2	0	1	1	1	0	6
D1A1D2A2D3A5a	Env/vpu	0	0	0	0	0	0	0	2	0	0	0	2
D1A1D2A2D3A4b	Env/vpu	0	0	0	0	0	1	0	0	1	0	0	2
D1A5c	Env/vpu	0	0	0	0	1	0	0	0	0	0	0	1
D1cA5c	Env/vpu	0	1	0	0	1	2	0	0	0	1	0	5
D1A1D2A2D3A5c	Env/vpu	0	1	0	0	0	0	0	0	0	0	0	1
D1A1D2bA2D3A5	Env/vpu	0	0	0	0	2	0	0	0	0	0	2	4
D1A2D3A4c	Env/vpu	0	0	1	0	0	0	0	0	0	0	0	1
D1cA4a	Env/vpu	0	0	0	0	0	1	0	0	0	1	0	2
D1cA1D2bA5	Env/vpu	0	0	0	0	0	0	0	0	0	0	1	1
D1cA1bD2bA5	Env/vpu	0	0	0	0	1	0	0	0	0	0	0	1
D1A5	Env/vpu	69	290	314	162	173	356	199	306	84	219	314	2486
D1A2D3A4b	Env/vpu	0	0	9	2	1	9	3	1	1	1	4	31
D1A1D2A2D3A5	Env/vpu	2	10	10	4	4	17	4	6	5	3	11	76
D1A5a	Env/vpu	4	10	12	4	7	6	5	7	3	3	11	72
D1cA4b	Env/vpu	0	4	1	0	2	3	1	1	1	1	2	16
D1cA5	Env/vpu	1	10	22	11	9	26	13	17	8	11	16	144
D1A4b	Env/vpu	8	13	21	5	9	15	20	19	7	15	21	153
D1A4a	Env/vpu	1	8	17	5	13	10	7	13	5	9	14	102
D1A1D2A5	Env/vpu	5	20	36	5	24	38	17	35	5	21	22	228
D1A2D3A5	Env/vpu	5	37	38	15	27	41	27	41	13	31	64	339
D1A1bD2A5D4A7	Nef	1	0	2	0	6	6	1	2	0	1	1	20
D1A1D2A2D3A5aD4A7	Nef	0	0	0	0	0	1	2	1	1	0	1	6
D1A1D2A2D3A5D4aA7	Nef	0	0	1	0	1	2	0	1	0	0	2	7
D1A1D2A2D3A5D4bA7	Nef	0	1	0	0	2	1	0	0	0	0	0	4
D1A1D2A5aD4A7	Nef	0	2	1	0	5	0	0	4	0	1	1	14
D1A1D2A5D4aA7	Nef	0	1	2	1	4	3	6	3	5	3	4	32
D1A1D2A5D4bA7	Nef	1	0	0	0	0	3	0	1	1	0	1	7
D1A2D3A5aD4A7	Nef	0	3	3	0	4	3	3	2	2	2	2	24
D1A5cD4A7	Nef	0	1	0	1	0	1	1	0	0	1	1	6
D1cA1bD2A2D3A5D4A7	Nef	0	1	4	0	3	3	3	5	1	2	6	28
D1cA1bD2A5aD4A7	Nef	0	0	0	1	0	1	1	1	0	0	0	4
D1cA1bD2A5D4A7	Nef	0	4	2	3	7	9	6	8	6	6	14	65
D1cA1bD2A5D4aA7	Nef	0	0	0	0	0	2	0	1	0	0	0	3
D1cA1D2A2D3A5D4A7	Nef	0	1	2	2	9	8	6	3	1	2	7	41
D1cA1D2A5D4A7	Nef	2	6	3	2	5	15	6	7	3	8	6	63
D1cA2D3A5D4A7	Nef	1	0	2	1	3	2	0	0	2	1	0	12
D1cA5D4aA7	Nef	0	2	1	0	1	0	2	1	0	1	1	9
D1A5aD4bA7	Nef	0	0	0	0	0	0	0	1	0	0	0	1
D1A1bD2A5D4bA7	Nef	0	0	0	0	0	0	0	1	0	0	0	1
D1cA1D2A5D4bA7	Nef	0	1	0	0	0	0	0	1	0	0	0	2
D1A2D3A5D4bA7	Nef	0	0	0	2	0	1	1	1	1	2	1	9
D1cA1D2A2D3A5D4bA7	Nef	0	0	0	0	0	0	0	1	0	0	0	1
D1A1D2A2D3A5cD4A7	Nef	0	0	0	0	0	0	0	1	0	0	0	1
D1A1bD2A2D3A5D4A7	Nef	0	3	0	0	1	3	0	1	0	2	2	12
D1A5cD4aA7	Nef	0	0	0	0	0	0	0	0	1	0	0	1
D1A5aD4aA7	Nef	0	0	0	0	0	0	0	0	0	0	1	1
D1cA1bD2A2D3A5D4aA7	Nef	0	0	1	1	0	0	0	0	0	0	1	3
D1cA1bD2bA5D4A7	Nef	0	1	0	0	0	0	0	0	0	0	0	1
D1A1D2A5cD4A7	Nef	0	0	0	0	1	0	0	0	0	1	0	2
D1cA1D2A2D3A5aD4A7	Nef	0	0	0	0	0	0	0	0	0	0	1	1
D1cA1D2bA5D4A7	Nef	0	0	1	0	1	0	1	0	0	0	1	4
D1cA1bD2bA2D3A5D4A7	Nef	0	0	0	0	0	1	0	0	0	0	1	2
D1cA1D2bA2D3A5D4A7	Nef	0	0	0	0	0	1	0	0	0	0	0	1
D1cA1bD2A5D4bA7	Nef	0	0	0	1	0	0	0	0	0	0	0	1
D2A2D3A5D4A7	Nef	0	1	0	0	0	0	0	0	0	0	0	1
D1A1D2A2D3A5aD4bA7	Nef	0	0	1	0	0	0	0	0	0	0	0	1
D1cA1D2A2D3A5D4aA7	Nef	0	0	0	0	1	0	0	0	0	0	0	1
D1A1bD2A5aD4A7	Nef	0	0	0	0	1	0	0	0	0	0	0	1
D1A7	Nef	1	9	7	8	5	7	6	8	3	3	12	69
D1cA5D4A7	Nef	8	24	23	13	41	54	36	35	18	32	46	330
D1A5D4aA7	Nef	0	9	12	6	16	24	13	14	5	8	19	126
D1A2D3A5D4aA7	Nef	1	2	2	0	0	3	3	1	1	1	5	19
D1cA5cD4A7	Nef	0	0	0	0	3	3	0	0	0	0	2	8
D1A5D4bA7	Nef	0	0	2	1	6	5	1	3	3	4	6	31
D1A5D4A7	Nef	64	313	454	218	638	970	612	709	215	567	764	5524
D1A1D2A5D4A7	Nef	22	71	101	44	175	232	132	167	48	132	160	1284
D1A2D3A5D4A7	Nef	12	58	93	40	120	222	130	151	40	102	161	1129
D1A1D2A2D3A5D4A7	Nef	5	16	38	17	67	104	47	55	13	50	71	483
D1A5aD4A7	Nef	0	9	10	5	26	27	15	17	4	13	22	148
D1A1D2A2D3A4cD4A7	Rev	0	0	1	0	0	0	0	1	0	0	0	2
D1A1D2A4cD4A7	Rev	0	1	0	0	0	1	0	1	0	0	1	4
D1A2D3A4bD4bA7	Rev	0	0	0	0	0	0	0	1	0	0	0	1
D1A4aD4aA7	Rev	0	1	2	0	3	1	0	2	0	1	0	10
D1A4aD4bA7	Rev	0	0	1	0	0	0	1	0	0	0	1	3
D1A4bD4aA7	Rev	0	0	2	0	1	0	3	1	1	0	3	11
D1A4bD4bA7	Rev	0	1	0	0	0	0	1	0	0	2	0	4
D1A4cD4aA7	Rev	0	0	0	0	0	0	0	0	0	0	1	1
D1cA1bD2A2D3A4aD4A7	Rev	0	0	0	0	0	0	0	0	1	0	0	1
D1cA1bD2A2D3A4bD4A7	Rev	0	0	0	0	1	0	0	1	0	0	2	4
D1cA1bD2A4aD4A7	Rev	0	0	0	0	1	1	0	0	0	0	0	2
D1cA1bD2A4bD4A7	Rev	0	0	0	0	0	0	2	0	0	1	2	5
D1cA1D2A2D3A4bD4A7	Rev	0	0	0	0	1	1	0	0	0	1	0	3
D1cA1D2A4bD4A7	Rev	0	0	0	0	1	1	0	1	0	0	1	4
D1cA4aD4A7	Rev	1	1	0	0	3	1	2	2	0	1	3	14
D1cA4cD4A7	Rev	0	0	0	0	0	0	1	0	0	2	4	7
D1cA1D2A4aD4A7	Rev	0	0	0	0	0	1	0	2	0	0	0	3
D1cA1bD2bA4bD4A7	Rev	0	0	0	0	0	0	0	1	0	0	0	1
D1A1D2bA4cD4A7	Rev	0	0	0	0	0	0	0	1	0	0	0	1
D1cA1D2bA4bD4A7	Rev	0	0	0	0	0	0	0	1	0	0	0	1
D1A1D2A4aD4aA7	Rev	0	0	0	0	0	0	0	1	0	0	0	1
D1A1bD2A2D3A4bD4A7	Rev	0	0	0	1	0	0	0	1	0	0	0	2
D1cA1D2A2D3A4aD4A7	Rev	0	0	0	0	2	1	0	0	1	0	1	5
D1A1D2bA4bD4A7	Rev	0	1	1	0	0	2	0	0	0	0	0	4
D1A2D3A4bD4aA7	Rev	0	0	1	0	1	0	2	0	0	0	0	4
D1A2D3A4aD4aA7	Rev	0	0	0	1	0	0	0	0	0	0	0	1
D1A1D2bA2D3A4aD4A7	Rev	0	0	0	0	0	0	1	0	0	0	0	1
D1cA2D3A4aD4A7	Rev	0	0	0	0	0	1	0	0	0	0	0	1
D1A2D3A4aD4bA7	Rev	0	0	0	0	0	1	0	0	0	0	0	1
D1cA1bD2A2D3A4cD4A7	Rev	0	0	0	0	0	0	0	0	0	0	1	1
D1cA2D3A4bD4A7	Rev	0	0	0	0	0	0	0	0	0	1	1	2
D1A1bD2A4bD4A7	Rev	0	0	0	0	0	0	0	0	0	0	1	1
D1A1D2A2D3A4cD4aA7	Rev	0	0	0	1	0	0	0	0	0	0	0	1
D1A1D2A2D3A4bD4aA7	Rev	0	0	0	0	1	0	0	0	0	0	0	1
D1cA4bD4aA7	Rev	0	1	0	0	1	0	0	0	0	0	0	2
D1A1D2A4bD4aA7	Rev	0	0	0	0	1	1	0	0	0	0	0	2
D1A1D2A4cD4bA7	Rev	0	0	0	0	0	0	0	0	0	0	1	1
D1A1D2A2D3A4aD4bA7	Rev	0	0	0	0	0	0	0	0	0	0	1	1
D1cA1D2A2D3A4bD4aA7	Rev	0	0	0	0	0	0	0	0	0	0	1	1
D1A1D2bA2D3A4bD4A7	Rev	0	0	0	0	0	0	0	0	0	0	1	1
D1A1D2A4cD4aA7	Rev	0	0	0	0	0	1	0	0	0	0	0	1
D1cA1bD2bA2D3A4aD4aA7	Rev	0	0	0	0	0	1	0	0	0	0	0	1
D1A4bD4A7	Rev	9	46	56	31	72	115	70	72	23	54	79	627
D1A1D2A2D3A4bD4A7	Rev	0	5	2	4	7	15	4	5	2	7	8	59
D1A1D2A2D3A4aD4A7	Rev	0	4	2	3	5	7	5	9	2	6	9	52
D1cA4bD4A7	Rev	0	3	5	1	6	12	7	6	2	4	5	51
D1A4aD4A7	Rev	5	50	62	34	69	137	74	90	30	74	101	726
D1A4cD4A7	Rev	0	6	8	1	4	9	11	10	2	5	12	68
D1A1D2A4bD4A7	Rev	2	10	7	5	9	12	8	11	4	10	12	90
D1A1D2A4aD4A7	Rev	0	4	5	2	5	8	3	0	4	4	7	42
D1A2D3A4bD4A7	Rev	1	9	8	3	16	23	12	12	5	11	15	115
D1A2D3A4aD4A7	Rev	2	10	15	1	11	17	9	11	6	11	11	104
D1A2D3A4cD4A7	Rev	0	1	3	1	0	2	0	0	0	1	0	8
D1A1D2A3D4bA7	sORF	0	0	0	0	0	0	2	0	0	0	0	2
D1cA1bD2bA3D4A7	sORF	0	1	0	0	0	1	0	0	0	0	0	2
D1cA1bD2A3D4aA7	sORF	0	0	0	0	0	1	1	0	0	0	0	2
D1A1D2bA3D4A7	sORF	0	3	3	3	6	4	5	6	4	3	6	43
D1A1D2bA2D3A3D4A7	sORF	0	2	0	0	1	4	1	1	1	1	2	13
D1A1bD2A3D4A7	Tat	0	0	0	0	1	4	0	0	0	4	2	11
D1A1D2A2D3A3	Tat	0	1	0	0	0	0	0	2	0	0	0	3
D1A1D2A3D4aA7	Tat	0	0	4	0	2	2	0	0	1	2	4	15
D1A3D4aA7	Tat	0	1	0	0	1	0	1	1	1	3	1	9
D1cA1bD2A2D3A3D4A7	Tat	0	0	0	0	1	2	0	1	0	0	0	4
D1cA1bD2A3	Tat	0	0	0	0	0	1	0	1	0	0	0	2
D1cA1bD2A3D4A7	Tat	1	2	4	2	11	12	1	2	1	4	4	44
D1cA1D2A2D3A3D4A7	Tat	0	0	0	0	0	1	1	0	0	1	1	4
D1cA1D2A3D4A7	Tat	0	3	1	0	7	10	4	1	2	7	6	41
D1cA3D4aA7	Tat	0	1	0	0	0	0	0	0	0	0	1	2
D1cA1D2A3	Tat	0	0	0	0	0	1	0	1	0	0	0	2
D1A1D2bA3D4bA7	Tat	0	0	0	0	0	0	0	1	0	0	0	1
D1cA2D3A3D4A7	Tat	1	0	0	0	0	1	1	1	0	0	0	4
D1cA1bD2A2D3A3D4bA7	Tat	0	0	0	0	1	0	0	0	0	0	0	1
D1A3D4bA7	Tat	0	0	0	1	0	0	0	0	0	0	1	2
D1A1D2A2D3A3D4bA7	Tat	0	0	1	0	0	0	0	0	0	0	0	1
D1A3D4A7	Tat	6	37	42	19	71	91	49	58	19	48	64	504
D1A1D2A3D4A7	Tat	12	38	66	28	108	141	90	97	30	82	92	784
D1A2D3A3D4A7	Tat	1	7	9	6	11	18	7	11	4	7	13	94
D1A1D2A2D3A3D4A7	Tat	0	6	7	4	12	12	7	4	3	7	9	71
D1A3	Tat	1	2	6	3	8	10	12	11	3	6	9	71
D1A1D2A3	Tat	1	0	2	0	2	6	5	4	1	2	2	25
D1A2D3A3	Tat	0	0	0	1	0	2	0	0	2	0	0	5
D1cA3D4A7	Tat	0	0	1	0	0	4	0	1	0	0	2	8
D1A2D4aA7	Vif	0	1	0	0	0	0	0	2	1	0	3	7
D1cA2	Vif	0	2	1	0	1	2	0	3	2	1	2	14
D1cA1D4A7	Vif	0	2	1	1	0	1	0	1	0	0	1	7
D1cA1bD4A7	Vif	0	0	1	0	0	0	0	1	0	0	0	2
D1A1D4A7	Vif	0	12	17	13	12	8	5	7	1	3	6	84
D1A1	Vif	31	97	110	52	100	181	79	127	45	102	136	1060
D1cA1b	Vif	2	9	7	2	1	12	4	6	1	4	2	50
D1cA1	Vif	2	3	3	2	3	14	8	7	2	3	8	55
D1A1b	Vif	0	1	0	0	1	5	1	0	1	3	2	14
D1cA1bD2A2D4A7	Vpr	0	0	0	0	0	0	0	0	0	1	0	1
D1cA1D2A2	Vpr	0	1	1	0	1	3	1	1	0	0	0	8
D1A1D2bA2D4A7	Vpr	0	2	1	0	0	4	1	1	0	0	1	10
D1cA1D2A2D4A7	Vpr	0	0	1	0	0	0	0	0	1	0	0	2
D1cA2D4A7	Vpr	0	0	0	0	1	0	1	0	0	0	1	3
D1A1D2A2D4aA7	Vpr	1	0	0	0	0	0	0	0	0	1	0	2
D1cA1bD2A2	Vpr	0	0	1	1	2	2	0	0	0	0	0	6
D1cA1bD2bA2	Vpr	0	0	0	0	0	0	0	0	0	0	1	1
D1A2D4A7	Vpr	4	6	14	3	8	14	9	16	4	18	15	111
D1A1D2A2D4A7	Vpr	0	8	5	3	3	6	6	8	0	7	6	52
D1A2	Vpr	14	60	80	35	49	103	52	95	32	54	94	668
D1A1D2A2	Vpr	4	11	13	5	17	32	18	14	8	6	11	139

## Sheet: WT_Subgroup
Supplementary Table 2__Transcripts_splicing_junctions_counts
	WT	A	B	C	D	E	F	G	H
D1A1bD2A2D3A5	Env/vpu	0	0	0	0	0	0	0	0
D1A1D2A2D3A4a	Env/vpu	1	1	0	0	0	0	0	0
D1A1D2A4b	Env/vpu	0	2	0	0	0	2	0	0
D1A1D2A5a	Env/vpu	0	1	0	0	0	0	0	0
D1A4c	Env/vpu	2	1	0	0	1	0	0	0
D1cA1bD2A5	Env/vpu	1	1	1	0	0	0	0	0
D1cA1D2A5	Env/vpu	2	2	0	0	0	0	0	0
D1cA2D3A5	Env/vpu	1	1	0	0	0	0	0	0
D1A2D3A4a	Env/vpu	0	2	1	0	0	0	0	0
D1A2D3A5a	Env/vpu	1	0	1	0	0	0	0	0
D1cA1D2A5a	Env/vpu	0	0	0	0	0	0	0	0
D1cA1bD2A2D3A5	Env/vpu	0	0	0	0	0	0	0	0
D1cA1D2A2D3A4b	Env/vpu	0	0	0	0	0	0	0	0
D1cA1D2A2D3A5	Env/vpu	0	0	0	0	0	0	0	0
D1A1D2A2D3A5a	Env/vpu	0	0	0	0	0	0	0	0
D1A1D2A2D3A4b	Env/vpu	0	0	0	0	0	0	0	0
D1A5c	Env/vpu	0	0	0	0	0	0	0	0
D1cA5c	Env/vpu	0	0	0	0	0	0	0	0
D1A1D2A2D3A5c	Env/vpu	0	0	0	0	0	0	1	0
D1A1D2bA2D3A5	Env/vpu	0	0	0	0	0	0	0	0
D1A2D3A4c	Env/vpu	0	0	0	0	0	0	0	1
D1cA4a	Env/vpu	0	0	0	0	0	0	0	0
D1cA1D2bA5	Env/vpu	0	0	0	0	0	0	0	0
D1cA1bD2bA5	Env/vpu	0	0	0	0	0	0	0	0
D1A5	Env/vpu	181	266	63	58	69	76	10	20
D1A2D3A4b	Env/vpu	2	3	3	1	0	1	0	0
D1A1D2A2D3A5	Env/vpu	8	5	2	3	3	1	0	1
D1A5a	Env/vpu	4	9	3	3	3	3	1	2
D1cA4b	Env/vpu	2	0	1	0	1	0	1	0
D1cA5	Env/vpu	7	12	4	1	5	5	1	3
D1A4b	Env/vpu	15	11	2	2	2	4	1	6
D1A4a	Env/vpu	15	5	3	0	3	2	1	0
D1A1D2A5	Env/vpu	28	17	1	4	3	3	0	6
D1A2D3A5	Env/vpu	25	31	7	6	9	4	3	0
D1A1bD2A5D4A7	Nef	2	0	0	0	0	0	0	0
D1A1D2A2D3A5aD4A7	Nef	0	0	0	0	0	0	0	0
D1A1D2A2D3A5D4aA7	Nef	0	1	0	0	0	0	0	0
D1A1D2A2D3A5D4bA7	Nef	1	0	0	0	0	0	0	0
D1A1D2A5aD4A7	Nef	2	0	0	0	0	0	0	0
D1A1D2A5D4aA7	Nef	1	0	0	0	0	1	0	0
D1A1D2A5D4bA7	Nef	1	0	0	0	0	0	0	0
D1A2D3A5aD4A7	Nef	1	3	0	0	1	0	0	0
D1A5cD4A7	Nef	0	0	1	0	1	0	0	0
D1cA1bD2A2D3A5D4A7	Nef	2	2	1	0	0	0	0	0
D1cA1bD2A5aD4A7	Nef	0	1	0	0	0	0	0	0
D1cA1bD2A5D4A7	Nef	3	4	0	0	0	1	0	0
D1cA1bD2A5D4aA7	Nef	0	0	0	0	0	0	0	0
D1cA1D2A2D3A5D4A7	Nef	0	1	1	0	0	0	0	0
D1cA1D2A5D4A7	Nef	2	5	0	2	1	1	0	0
D1cA2D3A5D4A7	Nef	3	0	1	0	0	0	0	0
D1cA5D4aA7	Nef	1	0	0	0	0	1	0	0
D1A5aD4bA7	Nef	0	0	0	0	0	0	0	0
D1A1bD2A5D4bA7	Nef	0	0	0	0	0	0	0	0
D1cA1D2A5D4bA7	Nef	1	0	0	0	0	0	0	0
D1A2D3A5D4bA7	Nef	0	1	1	0	0	0	0	0
D1cA1D2A2D3A5D4bA7	Nef	0	0	0	0	0	0	0	0
D1A1D2A2D3A5cD4A7	Nef	0	0	0	0	0	0	0	0
D1A1bD2A2D3A5D4A7	Nef	2	1	0	0	0	0	0	0
D1A5cD4aA7	Nef	0	0	0	0	0	0	0	0
D1A5aD4aA7	Nef	0	0	0	0	0	0	0	0
D1cA1bD2A2D3A5D4aA7	Nef	0	0	0	0	0	1	0	0
D1cA1bD2bA5D4A7	Nef	0	1	0	0	0	0	0	0
D1A1D2A5cD4A7	Nef	0	0	0	0	0	0	0	0
D1cA1D2A2D3A5aD4A7	Nef	0	0	0	0	0	0	0	0
D1cA1D2bA5D4A7	Nef	1	0	0	0	0	0	0	0
D1cA1bD2bA2D3A5D4A7	Nef	0	0	0	0	0	0	0	0
D1cA1D2bA2D3A5D4A7	Nef	0	0	0	0	0	0	0	0
D1cA1bD2A5D4bA7	Nef	1	0	0	0	0	0	0	0
D2A2D3A5D4A7	Nef	0	0	0	0	0	0	0	0
D1A1D2A2D3A5aD4bA7	Nef	0	0	0	0	0	0	0	0
D1cA1D2A2D3A5D4aA7	Nef	0	0	0	0	0	0	0	0
D1A1bD2A5aD4A7	Nef	0	0	0	0	0	0	0	0
D1A7	Nef	9	6	3	0	2	1	0	0
D1cA5D4A7	Nef	25	15	2	2	4	2	0	2
D1A5D4aA7	Nef	10	11	1	0	1	2	0	0
D1A2D3A5D4aA7	Nef	1	1	1	0	1	0	0	0
D1cA5cD4A7	Nef	0	0	0	0	0	0	0	0
D1A5D4bA7	Nef	2	1	0	0	0	0	0	0
D1A5D4A7	Nef	271	301	56	55	64	72	11	24
D1A1D2A5D4A7	Nef	61	58	18	15	18	15	5	5
D1A2D3A5D4A7	Nef	51	55	12	8	15	14	2	5
D1A1D2A2D3A5D4A7	Nef	23	19	5	2	5	1	1	4
D1A5aD4A7	Nef	10	6	1	0	2	1	0	1
D1A1D2A2D3A4cD4A7	Rev	0	0	0	0	0	0	0	0
D1A1D2A4cD4A7	Rev	0	0	0	0	0	0	0	0
D1A2D3A4bD4bA7	Rev	0	0	0	0	0	0	0	0
D1A4aD4aA7	Rev	1	2	0	0	0	0	0	0
D1A4aD4bA7	Rev	0	0	0	0	0	0	0	0
D1A4bD4aA7	Rev	0	0	1	0	0	0	0	1
D1A4bD4bA7	Rev	0	0	0	0	0	0	0	0
D1A4cD4aA7	Rev	0	0	0	0	0	0	0	0
D1cA1bD2A2D3A4aD4A7	Rev	0	0	0	0	0	0	0	0
D1cA1bD2A2D3A4bD4A7	Rev	0	0	0	0	0	0	0	0
D1cA1bD2A4aD4A7	Rev	0	0	0	0	0	0	0	0
D1cA1bD2A4bD4A7	Rev	0	0	0	0	0	0	0	0
D1cA1D2A2D3A4bD4A7	Rev	0	0	0	0	0	0	0	0
D1cA1D2A4bD4A7	Rev	0	0	0	0	0	0	0	0
D1cA4aD4A7	Rev	1	0	0	0	0	0	0	0
D1cA4cD4A7	Rev	0	0	0	0	0	0	0	0
D1cA1D2A4aD4A7	Rev	0	0	0	0	0	0	0	0
D1cA1bD2bA4bD4A7	Rev	0	0	0	0	0	0	0	0
D1A1D2bA4cD4A7	Rev	0	0	0	0	0	0	0	0
D1cA1D2bA4bD4A7	Rev	0	0	0	0	0	0	0	0
D1A1D2A4aD4aA7	Rev	0	0	0	0	0	0	0	0
D1A1bD2A2D3A4bD4A7	Rev	0	0	0	0	0	0	0	0
D1cA1D2A2D3A4aD4A7	Rev	0	0	0	0	0	0	0	0
D1A1D2bA4bD4A7	Rev	0	2	0	0	0	0	0	0
D1A2D3A4bD4aA7	Rev	0	1	0	0	0	0	0	0
D1A2D3A4aD4aA7	Rev	1	0	0	0	0	0	0	0
D1A1D2bA2D3A4aD4A7	Rev	0	0	0	0	0	0	0	0
D1cA2D3A4aD4A7	Rev	0	0	0	0	0	0	0	0
D1A2D3A4aD4bA7	Rev	0	0	0	0	0	0	0	0
D1cA1bD2A2D3A4cD4A7	Rev	0	0	0	0	0	0	0	0
D1cA2D3A4bD4A7	Rev	0	0	0	0	0	0	0	0
D1A1bD2A4bD4A7	Rev	0	0	0	0	0	0	0	0
D1A1D2A2D3A4cD4aA7	Rev	1	0	0	0	0	0	0	0
D1A1D2A2D3A4bD4aA7	Rev	0	0	0	0	0	0	0	0
D1cA4bD4aA7	Rev	0	1	0	0	0	0	0	0
D1A1D2A4bD4aA7	Rev	0	0	0	0	0	0	0	0
D1A1D2A4cD4bA7	Rev	0	0	0	0	0	0	0	0
D1A1D2A2D3A4aD4bA7	Rev	0	0	0	0	0	0	0	0
D1cA1D2A2D3A4bD4aA7	Rev	0	0	0	0	0	0	0	0
D1A1D2bA2D3A4bD4A7	Rev	0	0	0	0	0	0	0	0
D1A1D2A4cD4aA7	Rev	0	0	0	0	0	0	0	0
D1cA1bD2bA2D3A4aD4aA7	Rev	0	0	0	0	0	0	0	0
D1A4bD4A7	Rev	37	40	7	7	14	8	2	2
D1A1D2A2D3A4bD4A7	Rev	3	3	0	2	1	0	1	0
D1A1D2A2D3A4aD4A7	Rev	4	2	0	0	1	0	0	0
D1cA4bD4A7	Rev	3	1	0	1	0	0	0	0
D1A4aD4A7	Rev	46	40	14	3	6	13	2	0
D1A4cD4A7	Rev	2	3	3	1	1	1	0	1
D1A1D2A4bD4A7	Rev	6	7	1	1	3	2	0	0
D1A1D2A4aD4A7	Rev	2	5	0	0	2	0	0	1
D1A2D3A4bD4A7	Rev	4	6	2	0	1	0	0	1
D1A2D3A4aD4A7	Rev	8	11	3	1	1	1	1	0
D1A2D3A4cD4A7	Rev	1	0	1	1	2	0	0	0
D1A1D2A3D4bA7	sORF	0	0	0	0	0	0	0	0
D1cA1bD2bA3D4A7	sORF	0	0	0	0	0	1	0	0
D1cA1bD2A3D4aA7	sORF	0	0	0	0	0	0	0	0
D1A1D2bA3D4A7	sORF	4	5	0	0	0	0	0	0
D1A1D2bA2D3A3D4A7	sORF	0	0	0	0	0	0	0	1
D1A1bD2A3D4A7	Tat	0	0	0	0	0	0	0	0
D1A1D2A2D3A3	Tat	0	0	0	0	0	0	0	1
D1A1D2A3D4aA7	Tat	1	3	0	0	0	0	0	0
D1A3D4aA7	Tat	0	0	0	0	0	0	0	0
D1cA1bD2A2D3A3D4A7	Tat	0	0	0	0	0	0	0	0
D1cA1bD2A3	Tat	0	0	0	0	0	0	0	0
D1cA1bD2A3D4A7	Tat	1	5	0	0	0	0	1	0
D1cA1D2A2D3A3D4A7	Tat	0	0	0	0	0	0	0	0
D1cA1D2A3D4A7	Tat	0	0	0	0	2	1	0	0
D1cA3D4aA7	Tat	0	0	0	0	0	0	0	0
D1cA1D2A3	Tat	0	0	0	0	0	0	0	0
D1A1D2bA3D4bA7	Tat	0	0	0	0	0	0	0	0
D1cA2D3A3D4A7	Tat	1	0	0	0	0	0	0	0
D1cA1bD2A2D3A3D4bA7	Tat	0	0	0	0	0	0	0	0
D1A3D4bA7	Tat	0	1	0	0	0	0	0	0
D1A1D2A2D3A3D4bA7	Tat	0	0	0	0	0	0	0	0
D1A3D4A7	Tat	32	33	5	9	8	2	2	1
D1A1D2A3D4A7	Tat	37	31	12	12	4	13	2	3
D1A2D3A3D4A7	Tat	6	8	2	0	0	2	0	1
D1A1D2A2D3A3D4A7	Tat	4	5	1	2	0	0	1	0
D1A3	Tat	7	4	0	0	1	0	0	0
D1A1D2A3	Tat	1	1	1	0	0	0	0	0
D1A2D3A3	Tat	0	1	0	0	0	0	0	0
D1cA3D4A7	Tat	1	0	0	0	0	0	0	0
D1A2D4aA7	Vif	1	0	0	0	0	0	0	0
D1cA2	Vif	2	0	0	0	0	1	0	0
D1cA1D4A7	Vif	0	0	0	0	0	0	0	0
D1cA1bD4A7	Vif	0	0	0	0	0	0	0	0
D1A1D4A7	Vif	0	1	0	0	0	0	0	0
D1A1	Vif	75	89	22	13	19	24	2	5
D1cA1b	Vif	3	3	2	1	0	3	0	2
D1cA1	Vif	2	5	0	0	0	0	0	1
D1A1b	Vif	0	0	0	0	0	0	0	0
D1cA1bD2A2D4A7	Vpr	0	0	0	0	0	0	0	0
D1cA1D2A2	Vpr	1	0	0	0	0	1	0	0
D1A1D2bA2D4A7	Vpr	0	0	0	0	0	0	1	0
D1cA1D2A2D4A7	Vpr	0	0	0	0	0	0	0	0
D1cA2D4A7	Vpr	0	0	0	0	0	0	0	0
D1A1D2A2D4aA7	Vpr	0	1	0	0	0	0	0	0
D1cA1bD2A2	Vpr	0	1	0	0	1	0	0	0
D1cA1bD2bA2	Vpr	0	0	0	0	0	0	0	0
D1A2D4A7	Vpr	10	4	1	1	0	3	0	0
D1A1D2A2D4A7	Vpr	1	4	0	0	1	1	0	0
D1A2	Vpr	49	50	5	10	14	19	3	11
D1A1D2A2	Vpr	11	12	1	0	1	5	1	0
