# Supplementary material for: Single-RNA-level analysis of full-length HIV-1 RNAs reveals functional redundancy of m6As
Source: Research Square preprint supplement (doi:10.21203/rs.3.rs-2679540/v1), 2023-06-16
Supplement: Supplementary file 2 [file 1d86e516e7e50d1fdb0306a9.xlsx]

## Sheet: DRS data
Supplementary Table 4_ONTsequencing_datalist
	Data	Total read #	Usage	Note
Control IVT	IVT full-length	5411	Tombo-MSC canonical control for WT viruses -- full-length analysis	canonical control (full-length)
	IVT full-length subreads	1450	IVT control (baseline control) for Tombo-MSC analysis -- full-length analysis	Baseline noise detection (full-length)
	IVT F1 & F2	54100	Tombo-MSC canonical control for WT viruses -- machine learning	canonical control (half-length)
	IVT F1 & F2 subreads	7083	impact of IVT lengths	half-length
	IVT F3-F9	39494	impact of IVT lengths	1-2Kb lengths
Mutant IVT	MutIVT	11000	Tombo-MSC canonical control for all mutant viruses	Mutations: A8079G, A8110G, A8975C,A8989T,A8034G,A8717G,A9097C,C9120T
	MutIVT subreads	1000	IVT control (baseline control) for Tombo-MSC analysis -- site confirmation	Mutations: A8079G, A8110G, A8975C,A8989T,A8034G,A8717G,A9097C,C9120T
Virion	Virion1	144919	virion RNA analysis	Standard prodedures (trial-1)
	Virion2	133314	virion RNA analysis	Multiplex RT DRS with 111 oliogs_1st
	Virion3	191605	virion RNA analysis	Multiplex RT DRS with 111 oliogs_2nd
	Virion4	308977	virion RNA analysis	Multiplex RT DRS with 111 oliogs_3rd
	ALKBH5 trmt	165729	ALKBH5 treated virion RNA analysis	ALKBH5 treated virion DRS
cellular (HEK293T)	Conventional	611416	Control for the Multiplexed RT procedure
	WT1	143472	viral and cellular RNA analysis	cellular RNA from WT HIV-1 producing cells
	WT2	869605	viral and cellular RNA analysis	cellular RNA from WT HIV-1 producing cells
	WT3	1322626	viral and cellular RNA analysis	cellular RNA from WT HIV-1 producing cells
	WT4	546099	viral and cellular RNA analysis	cellular RNA from WT HIV-1 producing cells
	Triple1	1104685	viral and cellular RNA analysis	cellular RNA from triple mutant HIV-1 producing cells
	Triple2	1490217	viral and cellular RNA analysis	cellular RNA from triple mutant HIV-1 producing cells
	Triple3	959472	viral and cellular RNA analysis	cellular RNA from triple mutant HIV-1 producing cells
	A8079G	1084966	RNA modification site confirmation/ viral and cellular RNA analysis	cellular RNA from A8079G HIV-1 producing cells
	A8110G	1052675	RNA modification site confirmation/ viral and cellular RNA analysis	cellular RNA from A8110G HIV-1 producing cells
	A8975C	327033	RNA modification site confirmation/ viral and cellular RNA analysis	cellular RNA from A8975C HIV-1 producing cells
	A8989T	677010	RNA modification site confirmation/ viral and cellular RNA analysis	cellular RNA from A8989T HIV-1 producing cells
m6A oligo standard	8079MOD	709	Positive training data set for 8079 m6A model	Positive training data set for 8079 m6A model
	8975MOD	532	Positive training data set for 8975 m6A model	Positive training data set for 8975 m6A model
	8989MOD	967	Positive training data set for 8989 m6A model	Positive training data set for 8989 m6A model
	8079UNM	685	Negative training data set for 8079 m6A model	Negative training data set for 8079 m6A model
	8975UNM	8118	Negative training data set for 8975 m6A model	Negative training data set for 8975 m6A model
	8989UNM	10679	Negative training data set for 8989 m6A model	Negative training data set for 8989 m6A model
