# Supplementary material for: Single-RNA-level analysis of full-length HIV-1 RNAs reveals functional redundancy of m6As
Source: Research Square preprint supplement (doi:10.21203/rs.3.rs-2679540/v1), 2023-06-16
Supplement: Supplementary file 3 [file 7c78f487a1be061413a7eb62.xlsx]

## Sheet: Oligonucleotides
Supplementary Table 5.Primer list
	All primers are ordered from IDT except 5'FAM probe is from Thermofisher Scientific
Purpose	Name	Sequence (5'-3')
Primers for multiplex RT and LC-MS/MS sample preparation	NL520R	TAAGCAGTGGGTTCCCTAGT
(Name based on HIV-1 pNL4-3 positions)	NL590R	GAGGGATCTCTAGTTACCAG
	NL660R	CTTTCAAGTCCCTGTTCGGG
	NL780R	TCTAGCCTCCGCTAGTCAAA
	NL870R	TTTCTTTCCCCCTGGCCTTA
	NL930R	AAAGGCCAGGATTAACTGCG
	NL1010R	TCTTCTGATCCTGTCTGAAG
	NL1097R	TTATCTAAGGCTTCCTTGGTGTC
	NL1160R	TTTCCTGTGTCAGCTGCTGC
	NL1240R	TTCTAGGTGATATGGCCTGA
	NL1290R	TTCTGGGCTGAAAGCCTTCT
	NL1380R	GGCTGCTTGATGTCCCCCCA
	NL1460R	GCAATAGGCCCTGCATGCAC
	NL1550R	GGATTATGTGTCATCCATCC
	NL1640R	TCCAGAATGCTGGTAGGGCT
	NL1720R	GTGAAGCTTGCTCGGCTCTT
	NL1820R	TCTAGTGTCGCTCCTGGTCC
	NL1910R	GCTGGATTTGTTACTTGGCT
	NL2010R	GGCCCTGCAATTTTTGGCTA
	NL2120R	CTTCCCTTGTGGGAAGGCCA
	NL2210R	TGAGAGGGAGTTGTTGTCTC
	NL2280R	GGGGTCGCTGCCAAAGAGTG
	NL2370R	CTGGCAAATTCATTTCTTCT
	NL2470R	CCTATAGCTTTATGTCCGCA
	NL2550R	GAAAATTTAAAGTGCAGCCA
	NL2610R	CTTTTGGGCCATCCATTCCT
	NL2710R	ATTGTATGGATTTTCAGGCC
	NL2800R	GAACTTCCCAGAAATCTTGA
	NL2890R	GCATCGCCCACATCCAGTAC
	NL2980R	TATCTAATCCCTGGTGTCTC
	NL3090R	AGATGACTATGTCTGGATTT
	NL3180R	TCAACAGATGTTGTCTCAGT
	NL3270R	CTGTCCATTTATCAGGATGG
	NL3350R	TGCCCAATTCAATTTTCCCA
	NL3420R	CTGTTAGTGCTTTGGTTCCC
	NL3500R	CACTCCATGTACCGGTTCTTTTAG
	NL3570R	TTTGATATGTCCATTGGCCT
	NL3660R	CCTCTGTTAATTGTTTCACA
	NL3760R	TCTGTCCACCATGCTTCCCA
	NL3840R	GTACCATAACTTCACTAAGG
	NL3890R	ATTGGCTGCCCCATCTACAT
	NL3940R	CCGTTAGGGGGACAACTTTT
	NL4060R	CCCAATGCATATTGTGAGTC
	NL4170R	CTTTGTGTGCTGGTACCCAT
	NL4250R	CTTATCTATTCCATCTAAAA
	NL4320R	CAGGTGGTAGGTTAAAATCA
	NL4400R	GCTACAGTCTACTTGTCCAT
	NL4500R	CTGGAATTACTTCTGCTTCT
	NL4600R	GTACTGGTGAAATTGCTGCC
	NL4680R	TTACTCCTTGACTTTGGGGATTG
	NL4760R	TTGTACTGCTGTCTTAAGAT
	NL4850R	GTCTGTTGCTATTATGTCTA
	NL4920R	TGCTGTCCCTGTAATAAACC
	NL4990R	CTCATCCTGTCTACTTGCCA
	NL5030R	GATCTTTGCTTTTCTTCTTGGCACTACT
	NL5180R	GTACTTTCATAGTGATGTCT
	NL5270R	CTTTCTCCTGTATGCAGACC
	NL5360R	ATTAGTTGGTCTGCTAGGTC
	NL5440R	CACACCTAGGACTAACTATA
	NL5540R	CTAACACTAGGCAAAGGTGG
	NL5610R	ATTCATTGTATGGCTCCCTCTG
	NL5720R	CCAAGTATCCCCGTAAGTTT
	NL5820R	TCCTCTGTCGAGTAACGCCT
	NL5880R	CTGACTTCCTGGATGCTTCC
	NL5940R	ACAAACTTGGCAATGAAAGC
	NL6020R	GTCTGACTGTTCTGATGAGC
	NL6130R	ATGATTACTATGGACCACAC
	NL6214R	TGTCTTCTGCTCTTTCTATTAGTCTA
	NL6300R	ATCATCAATATCCCAAGGAG
	NL6400R	TGCTTTAGCATCTGATGCAC
	NL6510R	TTCCACATGTTAAAATTTTCTGTCACATT
	NL6590R	GGGTTAATTTTACACATGGC
	NL6660R	ATTCTCCCGCTACTACTATT
	NL6740R	CATATTCTTTCTGCACCTTA
	NL6800R	AACTTATCAACCTATAGCTG
	NL6880R	ACCAGCCGGGGCACAATAAT
	NL6950R	GTACTGTGCTGACATTTGTA
	NL7020R	TCTTCTTCTGCTAGACTGCC
	NL7112R	TGGGTCTTGTACAATTAATTTCTACAGA
	NL7200R	GCTTGTCTCATATTTCCTAT
	NL7310R	CTGAGGATTGCTTAAAGATT
	NL7370R	TACAGTAGAAAAATTCCCCT
	NL7440R	TCAGTGTTATTTGACCCTTC
	NL7500R	TCCTGCCACATGTTTATAAA
	NL7580R	TTGTTAATAGCAGCCCAGTA
	NL7660R	TTCACTTCTCCAATTGTCCC
	NL7740R	TCTCTCTGCACCACTCTTCT
	NL7820R	TCATTGACGCTGCGCCCATA
	NL7910R	ACAGATGCTGTTGCGCCTCA
	NL7970R	ATCTTTCCACAGCCAGGATT
	NL8040R	GGCACAGCAGTGGTGCAAAT
	NL8120R	TAATTTCTCTGTCCCACTCC
	NL8180R	TCTTTTCTTGCTGGTTTTGC
	NL8380R	TGGGAGGTGGGTCTGAAACG
	NL8450R	TGGATCTGTCTCTGTCTCTC
	NL8520R	TGGTAGCTGAAGAGGCACAG
	NL8600R	AATATTTGAGGGCTTCCCAC
	NL8680R	TACTGCTATGGCTGTGGCAT
	NL8750R	TTCTAGGTATGTGGCGAATA
	NL8810R	ACTTTTTGACCACTTGCCAC
	NL8894R(NL8922R)	TACTTGTGATTGCTCCATGTTTTTCTAGG
	NL8980R	TCTTCCTCCTCTTGTGCTTC
	NL9050R	GCTAAGATCTACAGCTGCCT
	NL9140R	TTGTGTGTGGTAGATCCACA
	NL9220R	AGCTTGTAGCACCATCCAAA
	NL9290R	CACAGGGTGTAACAAGCTGG
	NL9360R	GAAATGCTAGGCGGCTGTCA
	NL9440R	CCCAGCGGAAAGTCCCTTGT
	NL9530R	CCAGTACAGGCAAAAAGCAG
	NL9600R	AGGCTTAAGCAGTGGGTTCC
	NL9660R	ACCAGAGTCACACAACAGAC
Primer used for target enrichment for LC-MS/MS	8975/8989 target site	/5'biosg/GCUACAAGGGACUUUCCGCUGGGGACUUUCCAGGGAG
Primer/probe used for 3D quantistudio digital PCR_HIV virus	NL 606_FAM	GGGTCTGAGGGATCTCTAGTTACCAGAGTC
	NL557F	TGTGTGCCCGTCTGTTGT
	NL712R	GCTTCAGCAAGCCGAGT
	NL780R	TCTAGCCTCCGCTAGTCAAA
