# Supplementary material for: Single-RNA-level analysis of full-length HIV-1 RNAs reveals functional redundancy of m6As
Source: Research Square preprint supplement (doi:10.21203/rs.3.rs-2679540/v1), 2023-06-16
Supplement: Supplementary file 4 [file b2fde65a5858931589f1efb9.xlsx]

## Sheet: Sheet1
Supplementary Table 3. Machine learning model features and training results
Model	Positions used (N-4 to N+1)*	Fishers method context	FPR# on training data	FNR# on training data	classifier coefficients	classifier intercept
model8079	8075-8080	0	0.108	0.109	[-0.34547949 -0.9208782 -1.93695271 -1.30223125 -0.66057939 -0.03071902]	[2.06536949]
		1	0.094	0.148	[-0.30059425 -0.56109914 -1.02882857 -1.29539713 0.08516563 -0.06038227]	[1.10136398]
		2	0.094	0.184	[-0.0764392 -0.92098764 -0.43570788 -0.78910634 -0.97088957 0.68224554]	[0.81887978]
		3	0.139	0.216	[-0.7696027 -0.13909294 -0.95252318 0.32474452 -0.60357557 -0.21745879]	[0.90747915]
model8975	8971-8976	0	0.084	0.124	[ 0.01279125 0.23676612 -1.93662577 -1.13772503 -0.28855367 -0.09328539]	[1.18534546]
		1	0.128	0.161	[ 0.41592349 -0.8218785 -0.3194929 -1.37820747 0.33391088 -0.15158181]	[0.77005448]
		2	0.164	0.184	[-0.02226465 -0.68633807 -0.435002 0.56962933 -1.81408067 0.54067394]	[0.78735257]
		3	0.208	0.198	[-0.70564875 -0.10194616 -0.01225604 -0.09776846 0.00592736 -1.01551456]	[0.92225047]
model8989	8985-8990	0	0.084	0.089	[ 0.41953861 -0.75628093 -1.58554783 -1.0435726 -0.99120439 0.0201099 ]	[1.38899581]
		1	0.092	0.135	[-0.01021205 -0.65235574 -0.54534129 -1.20571864 -0.2582533 -0.02786829]	[0.97999771]
		2	0.096	0.143	[-0.56861778 -0.07634834 -0.37723463 -0.71284867 -1.05275114 0.49154814]	[0.86721279]
		3	0.116	0.161	[-0.49890472 -0.94775776 0.32350379 0.30426882 -1.88678832 0.54988244]	[0.87282687]
* Putative m6A site = N0
# FPR = False positive rate = {negative control reads labeled as m6A modified} / {negative control reads}; FNR = False negative rate = {m6A positive control reads labeled as unmodified} / {m6A positive control reads}
