# Supplementary material for: Single-RNA-level analysis of full-length HIV-1 RNAs reveals functional redundancy of m6As
Source: Research Square preprint supplement (doi:10.21203/rs.3.rs-2679540/v1), 2023-06-16
Supplement: Supplementary file 5 [file d214618378fea33e0fe7690f.xlsx]

## Sheet: DRS data
Supplementary Table 1. ONT sequencing stats
Virion HIV-1 RNA	Total sequencing reads	HIV reads	> 8kb HIV
Virion1	144919	73749	1,861 (2.523)
Virion2	133314	72645	458 (0.630)
Virion3	191605	122630	761 (0.621)
Virion4	308977	176871	905 (0.512)
cellular (HEK293T)	Total sequening reads	HIV reads	> 8Kb HIV	CS	PS	US
WT1	143472	1069	99 (9.261)	164	151	82
WT2	869605	5909	403 (6.820)	825	596	334
WT3	1322626	7761	273 (3.518)	1127	718	225
WT4	546099	3604	204 (5.660)	539	332	169
Triple1	1104685	8817	86 (0.975)	1630	466	63
Triple2	1490217	8650	340 (3.931)	2430	917	280
Triple3	959472	5684	151 (2.657)	1442	487	127
A8079G	1084966	5994	361 (6.023)	1671	737	300
A8110G	1052675	9357	430 (4.595)	1849	755	339
A8975C	327033	1898	139 (7.323)	530	235	117
A8989T	1026301	8262	289 (3.498)	1340	504	241
